# Supplementary material
Source: PubMed Central journal article supplement (PMC11104052)
Supplement: sj-pdf-1-jfm-10.1177_1098612X14555441.pdf [file sj-pdf-1-jfm-10.1177_1098612X14555441.pdf]

Appendix A

Cerenia Trial Daily Log Sheet

Cat's Name: \_\_\_\_\_

Date: \_\_\_\_\_

**Describe your cat's appetite today:**

Decreased                  Unchanged                  Increased

**Did your cat vomit today.**

Yes    No

**Describe your cat's activity level today.**

Decreased                  Unchanged                  Increased

**Do you think your cat had a good quality of life today?**

Yes    No
